# Supplementary material for: Activated astrocytes enhance the dopaminergic differentiation of stem cells and promote brain repair through bFGF
Source: PubMed Central journal article supplement (PMC4284631; doi:10.1038/ncomms6627), 2014-12-17
Supplement: ncomms6627-s1.pdf [file ncomms6627-s1.pdf]

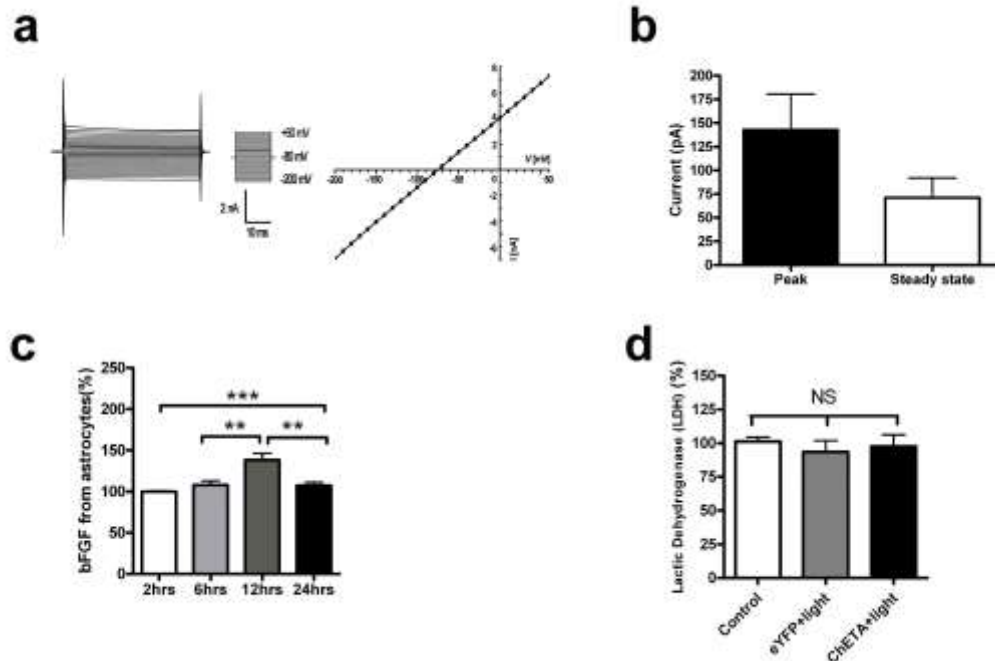

**Supplementary Figure 1. Electrophysiological recordings from the astrocytes and quantification of bFGF and LDH**

**(a)** IV curve of the cultured rat-midbrain-derived astrocytes. **(b)** The peak and steady-state amplitude of the induced depolarization current in astrocytes. (mean±s.e.m, n=6). **(c)** Quantification of released bFGF from astrocytes at 2, 6, 12 and 24 hours after the light stimulation. (mean±s.e.m, n=6). **(d)** Quantification of lactic dehydrogenase (LDH) release in the Control, eYFP+light and ChETA+light groups. (mean±s.e.m, n=6). All Student's t-test. \*\*,  $p < 0.01$ . \*\*\*,  $p < 0.001$ . NS, not significant.

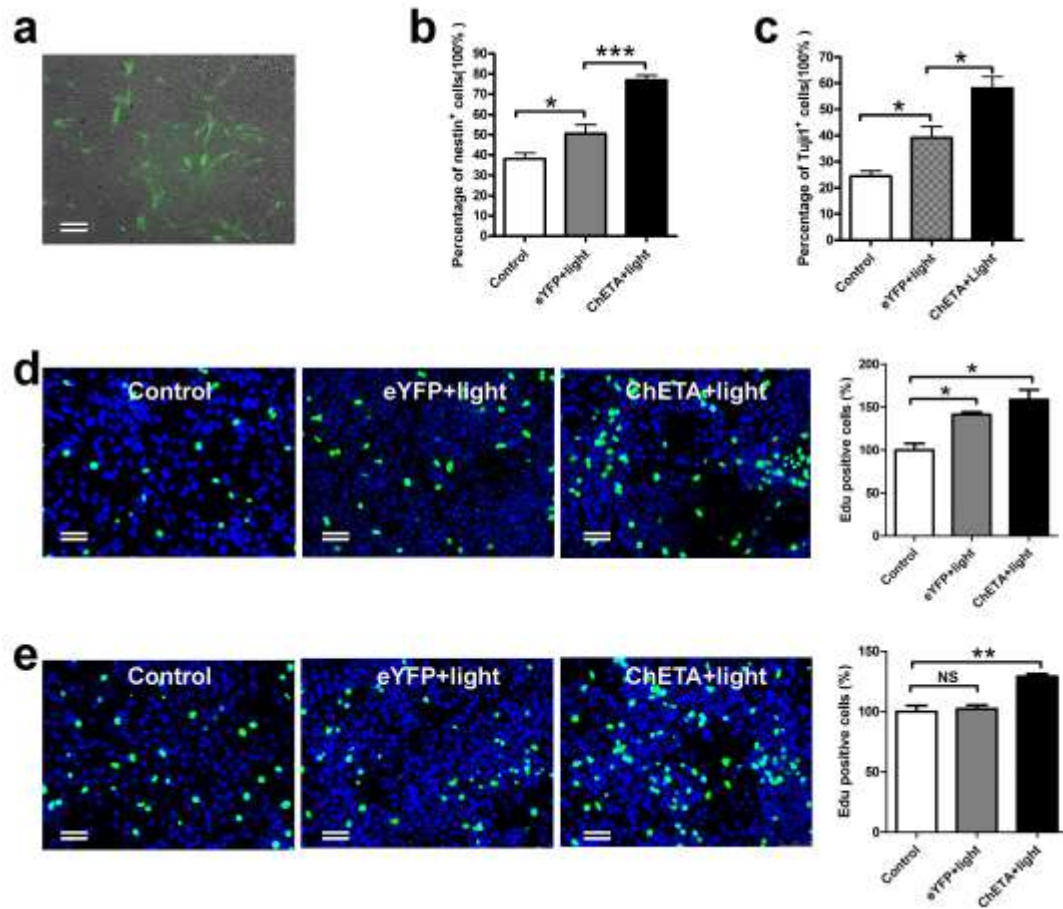

## Supplementary Figure 2. Light stimulation enhanced the differentiation and proliferation of the stem cells

(a) ChETA-transfected astrocytes (green) were co-cultured with differentiated human embryonic stem cells, Bars=50 $\mu$ m. (b) The percentage of Nestin positive cells in the Control, eYFP+light and ChETA+light groups. (mean $\pm$ s.e.m n=8). (c) The percentage of Tuj1 positive cells in the Control, eYFP+light and ChETA+light groups. (mean $\pm$ s.e.m, n=8). (d) 5-ethynyl-2-deoxyuridine (EdU)-incorporated cells were observed (left panel, green) and percentage of positive cells in the control, eYFP+light and ChETA+light groups (right panel) during the neural differentiation of the stem cells, (mean $\pm$ s.e.m, n=10). (e) EDU-incorporated cells were observed (left panel, green) and the percentage of positive cells was quantified in the control, eYFP+light and ChETA+light groups during the dopaminergic differentiation of the stem cells. (mean $\pm$ s.e.m, n=10) (right panel). All Student's t-test. \*,  $p < 0.05$ . \*\*,  $p < 0.01$ . \*\*\*,  $p < 0.001$ . NS, not significant.

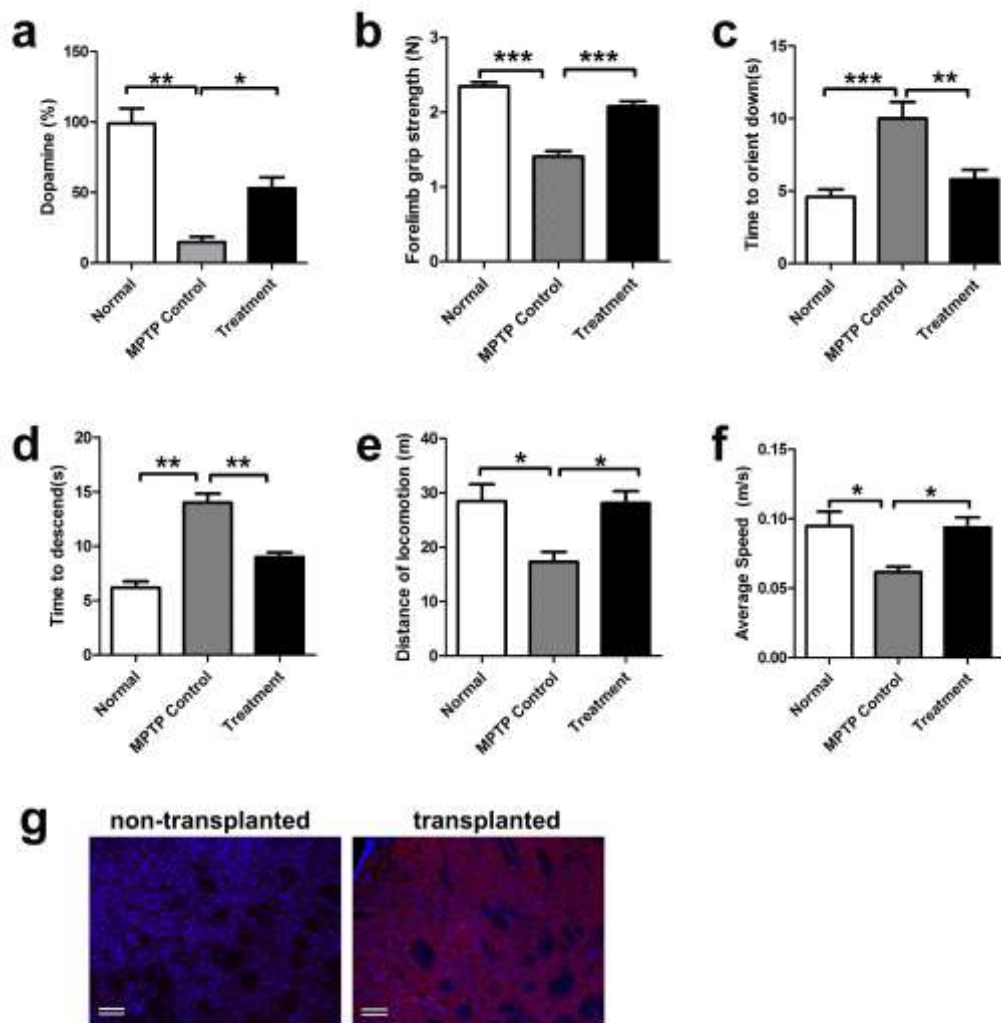

**Supplementary Figure 3. Dopamine level and Motor function tests after transplanting the differentiated dopaminergic neurons into substantianigra**

(a) The levels of dopamine in the dialysate from the striatum of mice in Normal, MPTP control and Treatment groups, (mean±s.e.m, n=3). (b) Forelimb grip strength in Normal, MPTP control and Treatment groups, (mean±s.e.m, n=5). (c) Time to orient down in the pole test for Normal, MPTP control and Treatment groups, (mean±s.e.m, n=5). (d) Time to descend in the pole test for Normal, MPTP control and Treatment groups, (mean±s.e.m, n=5). (e) Distance of locomotion in the open field test for Normal, MPTP control and Treatment groups, (mean±s.e.m, n=5). (f) Average speed in the open field test for Normal, MPTP control and Treatment groups, (mean±s.e.m, n=5). (g) TH staining in the transplanted side and non-transplanted side of the striatum. Bars=80µm. All Student's t-test. \*,  $p < 0.05$ . \*\*,  $p < 0.01$ . \*\*\*,  $p < 0.001$ .

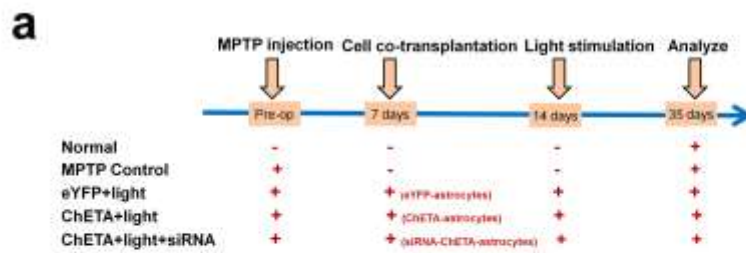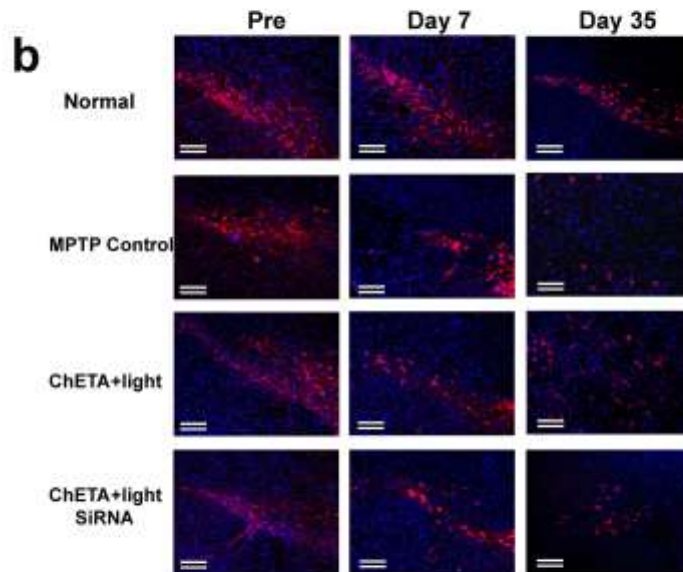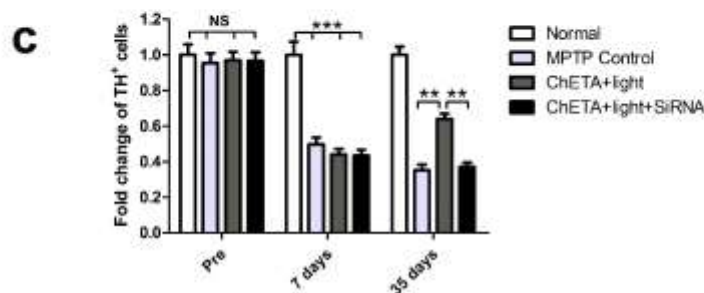

**Supplementary Figure 4. Schematic flowchart for the co-transplantation experiment and change of endogenous TH neurons in different groups**

(a) A schematic flowchart of the various manipulations in different groups in the co-transplantation experiment. (b) Immunostaining of endogenous TH-positive cells in Normal, MPTP Control, ChETA+light and ChETA+light+siRNA groups, Bars=50 $\mu$ m. (c) Fold change of TH<sup>+</sup> neurons at specific stages of MPTP degeneration and treatment. The number of TH<sup>+</sup> neurons in ChETA+light group was significantly higher than that of MPTP control group or siRNA group after the light stimulation, (mean $\pm$ s.e.m, n=3). One-way ANOVA followed by Bonferroni's multiple comparison's post-hoc test. \*\*,  $p < 0.01$ . \*\*\*,  $p < 0.001$ . NS, not significant.

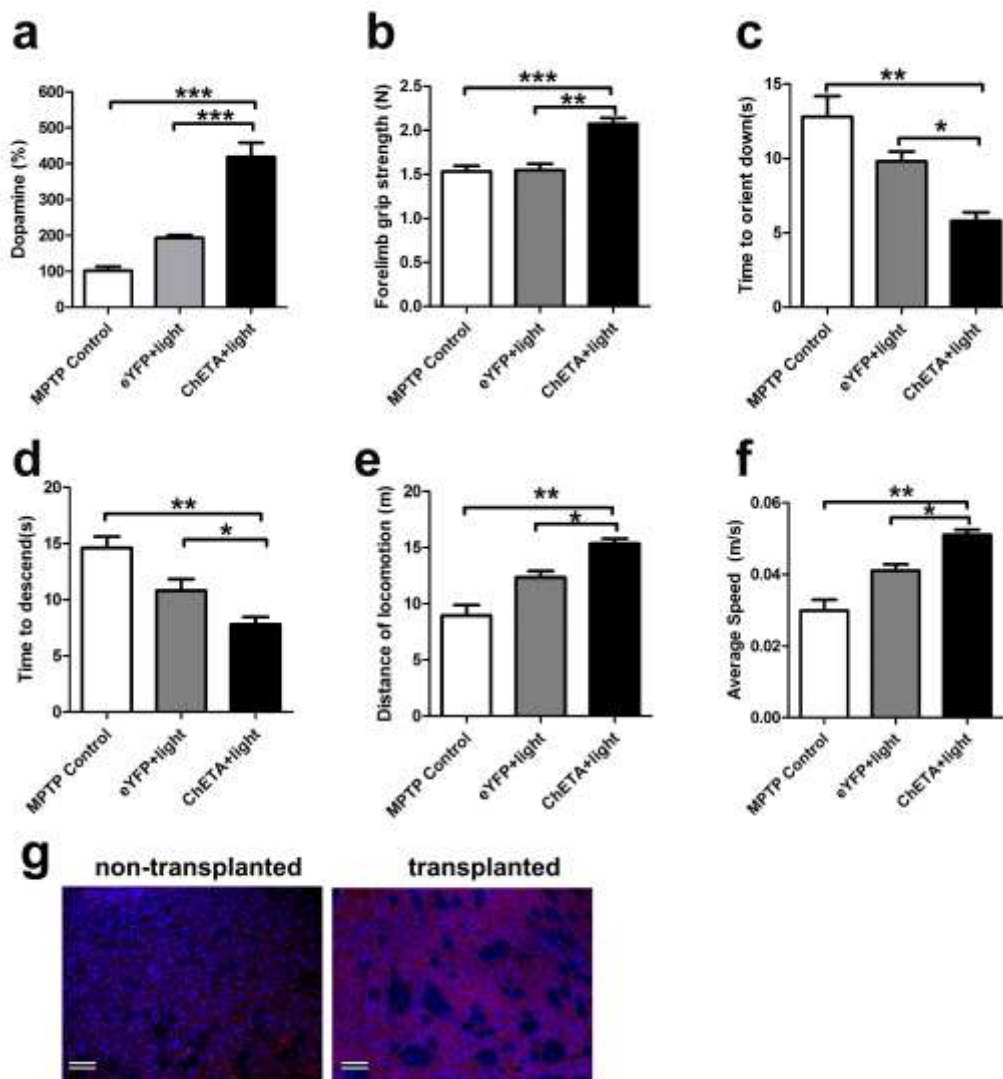

**Supplementary Figure 5. Dopamine level and Motor function tests in the substantianigra co-transplantation experiment**

(a) The levels of dopamine in the dialysate from the striatum of mice in MPTP control, eYFP+light and ChETA+light groups, (mean±s.e.m n=3). (b) Forelimb grip strength in MPTP control, eYFP+light and ChETA+light groups, (mean±s.e.m n=5). (c) Time to orient down in the pole test for MPTP control, eYFP+light and ChETA+light groups, (mean±s.e.m, n=5). (d) Time to descend in the pole test for MPTP control, eYFP+light and ChETA+light groups, (mean±s.e.m, n=5). (e) Distance of locomotion in the open field test for MPTP control, eYFP+light and ChETA+light groups, (mean±s.e.m, n=5). (f) Average speed in the open field test for MPTP control, eYFP+light and ChETA+light groups, (mean±s.e.m, n=5). (g) TH staining in the transplanted side and non-transplanted side of the striatum. Bars=80µm. All Student's t-test. \*, p<0.05. \*\*, p<0.01. \*\*\*, p<0.001.

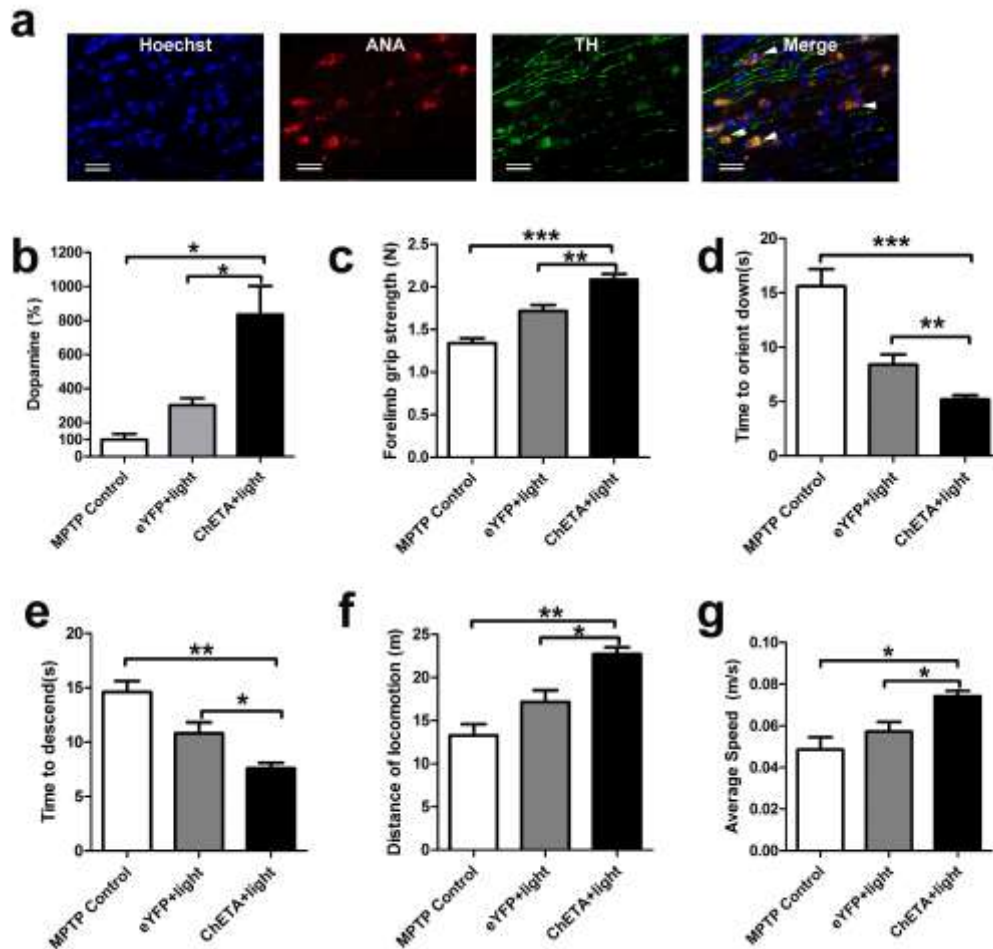

**Supplementary Figure 6. Light stimulation promotes brain repair after co-transplanting the astrocytes and ES-derived stem cells into the striatum in MPTP model**

(a) Immunostaining of TH (green) and ANA (red) of the transplanted stem cells in striatum region. Bars=20 μm. (b) The levels of dopamine in the dialysates from the striatum of mice in MPTP control, eYFP+light and ChETA+light groups, (mean±s.e.m, n=3). (c) Forelimb grip strength in MPTP control, eYFP+light and ChETA+light groups, (mean±s.e.m, n=5). (d) Time to orient down in the pole test for MPTP control, eYFP+light and ChETA+light groups, (mean±s.e.m n=5). (e) Time to descend in the pole test for MPTP control, eYFP+light and ChETA+light groups, (mean±s.e.m, n=5). (f) Distance of locomotion in the open field test for MPTP control, eYFP+light and ChETA+light, (mean±s.e.m, n=5). (g) Average speed in the open field test for MPTP control, eYFP+light and ChETA+light groups, (mean±s.e.m, n=5). All Student's t-test. \*,  $p < 0.05$ . \*\*,  $p < 0.01$ . \*\*\*,  $p < 0.001$ .

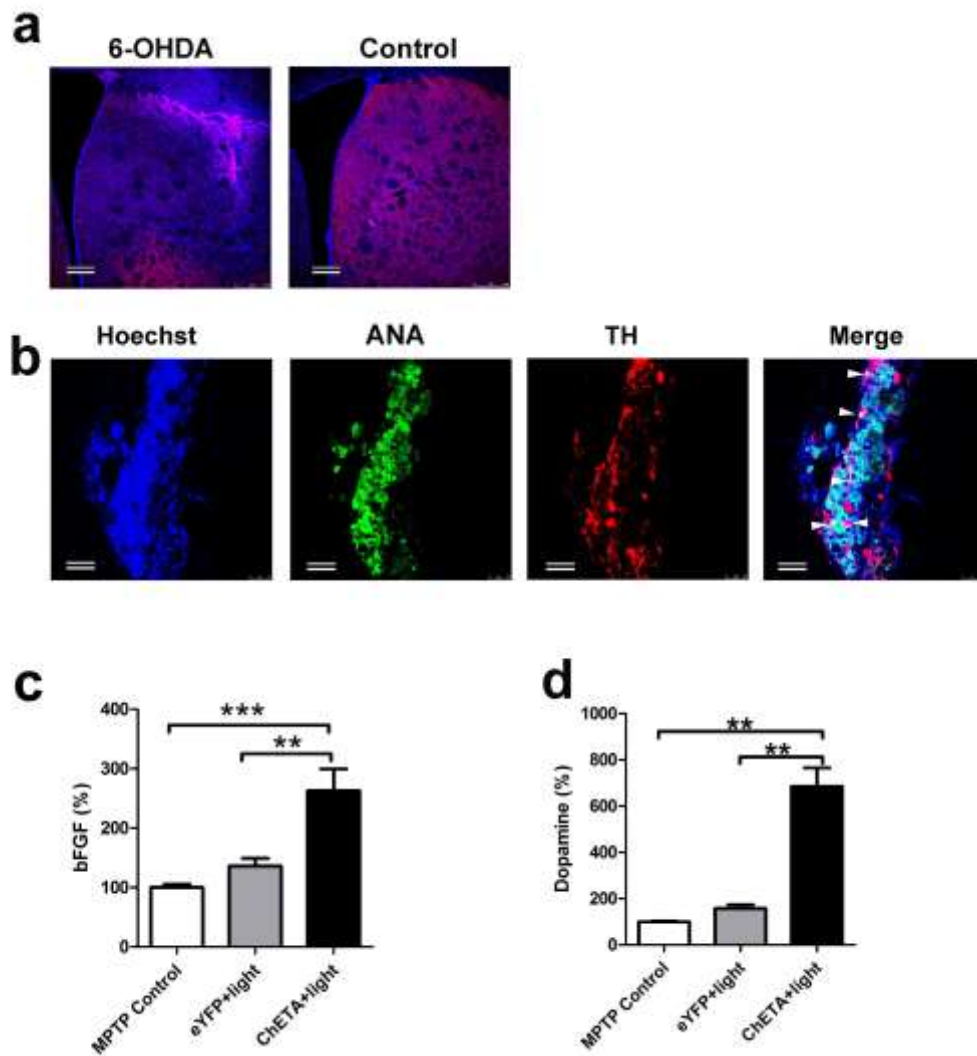

**Supplementary Figure 7. Light stimulation induced dopaminergic differentiation of stem cells, and increased bFGF and dopamine level after striatal transplantation in 6-OHDA model**

(a) Immunostaining of TH in striatum in 6-OHDA-induced PD model and control. Bars=150 $\mu$ m (b) Immunostaining of TH (green) and ANA (red) of the transplanted stem cells in striatum region. Bars=40 $\mu$ m. (c) Quantification of bFGF from striatum tissue in the Control, eYFP+light and ChETA+light groups. (mean $\pm$ s.e.m, n=3). (d) The levels of dopamine in the dialysate from the striatum of mice in MPTP control, eYFP+light and ChETA+light groups, (mean $\pm$ s.e.m, n=3). All Student's t-test. \*\*,  $p < 0.01$ . \*\*\*,  $p < 0.001$

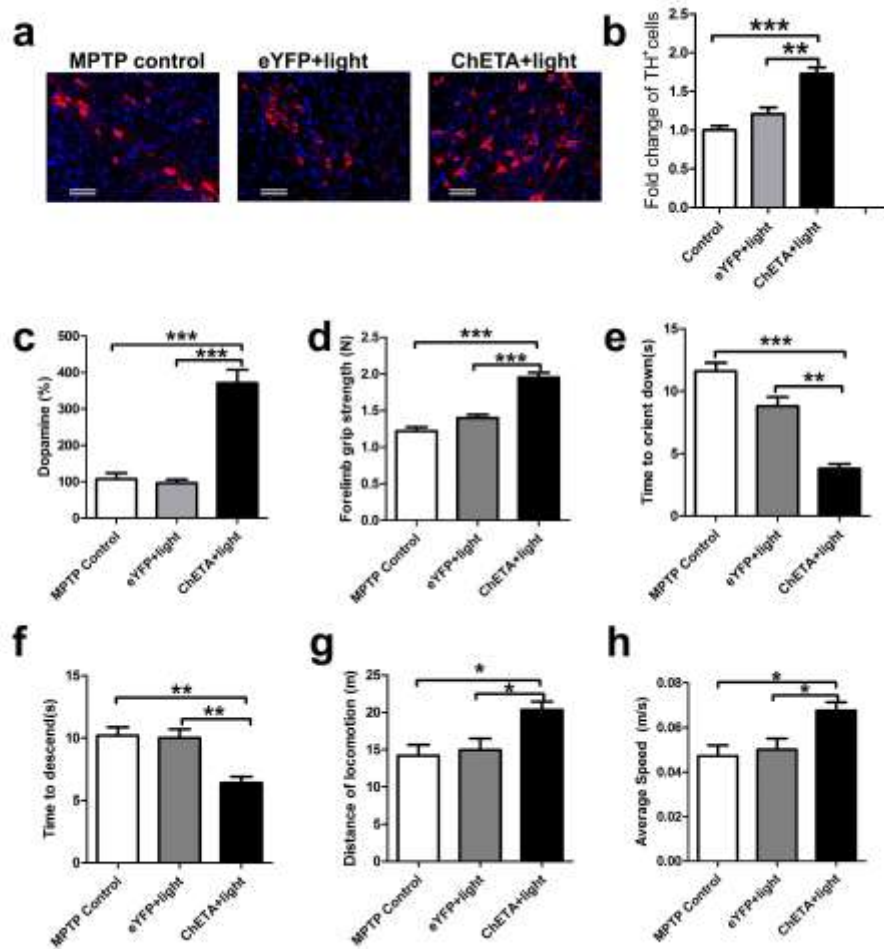

**Supplementary Figure 8. Light stimulation of endogenous astrocytes promotes functional repair and amelioration of the behavior deficits in the MPTP model**

(a) Immunostaining of endogenous TH-positive cells in MPTP Control, eYFP+light and ChETA+light groups. Bars=50 μm. (b) Fold change of TH<sup>+</sup> neurons in the three different groups, (mean±s.e.m, n=3). (c) The levels of dopamine in the dialysate from the striatum of mice in MPTP control, eYFP+light and ChETA+light groups, (mean±s.e.m, n=3). (d) Forelimb grip strength in MPTP control, eYFP+light and ChETA+light groups, (mean±s.e.m, n=5). (e) Time to orient down in the pole test for MPTP control, eYFP+light and ChETA+light groups, (mean±s.e.m, n=5). (f) Time to descend in the pole test for MPTP control, eYFP+light and ChETA+light groups, (mean±s.e.m, n=5). (g) Distance of locomotion in the open field test for MPTP control, eYFP+light and ChETA+light groups, (mean±s.e.m, n=5). (h) Average speed in the open field test for MPTP control, eYFP+light and ChETA+light groups, (mean±s.e.m, n=5). All Student's t-test. \*,  $p < 0.05$ . \*\*,  $p < 0.01$ . \*\*\*,  $p < 0.001$ .



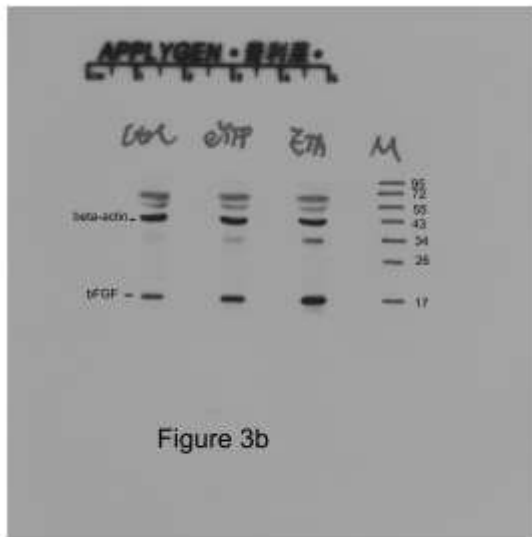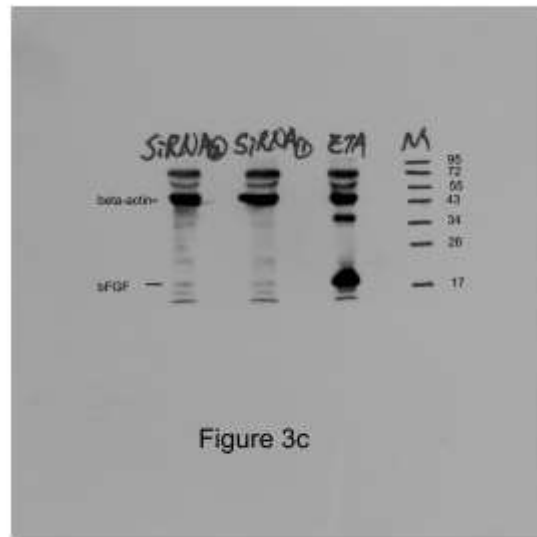

**Supplementary Figure 9.** Original scans of western blots shown in main text

**(left)** original scan of western blot shown in Figure 3b.

**(right)** original scan of western blot shown in Figure 3c.

**Supplementary Table 1**

| <b>Gene</b>  | <b>Primer sequence</b>                                               | <b>T<sub>m</sub>(°C)</b> | <b>Product size</b> |
|--------------|----------------------------------------------------------------------|--------------------------|---------------------|
| <i>Gapdh</i> | F 5'-ACCACAGTCCATGCCATCAC-3'<br>R 5'-TCCACCACCCTGTTGCTGTA-3'         | 57                       | 452bp               |
| <i>Tuj1</i>  | F 5'-GTTCCCACGTCTCCACTTCTTC-3'<br>R 5'-CCAGGTCATTCATGTTGCTCTC-3'     | 55                       | 479bp               |
| <i>TH</i>    | F 5'-GGTTCCCAAGAAAAGTGTGTCAG-3'<br>R 5'-GGTGTAGACCTCCTTCCAG-3'       | 55                       | 218bp               |
| <i>Nurr</i>  | F 5'-CGGACAGCAGTCCTCCATTAAGGT-3'<br>R 5'-CTGAAATCGGCAGTACTGACAGCG-3' | 61                       | 712bp               |
| <i>DAT</i>   | F 5'-AGCAGAACGGAGTGCAGCT-3'<br>R 5'-GTATGCTCTGATGCCGTCT-3'           | 55                       | 785bp               |
